1 **Similar effect of lidocaine and saline on ciliary beating of nasal epithelial cells in**  
2 **vitro**

3

4 Sibel T Savas<sup>1,2</sup>

5 Stefan A Tschanz<sup>3</sup>

6 Philipp Latzin<sup>1,2</sup>

7 Carmen Casaulta<sup>1,2</sup>

8 Loretta Müller<sup>1,2, \*</sup>

9

10 <sup>1</sup>Division of Paediatric Respiratory Medicine and Allergology, Department of  
11 Paediatrics, Inselspital, Bern University Hospital, University of Bern, Switzerland.

12 <sup>2</sup>Department of BioMedical Research (DBMR), Lung Precision Medicine, University of  
13 Bern, Switzerland

14 <sup>3</sup>Institute of Anatomy, University of Bern, Switzerland

15

16 **\*Corresponding Author:** [loretta.mueller@insel.ch](mailto:loretta.mueller@insel.ch); University of Bern, DBMR, Lung  
17 Precision Medicine (LPM), Paediatric Pulmonology, room 310, Murtenstrasse 28, 3008  
18 Bern, Switzerland

19

20 **Ethics statement:** The study was approved by the Ethics Committees of the University  
21 Children Hospital, Inselspital Bern and of the Canton Bern, Switzerland (reference  
22 number 2018-02155). Written informed consent was obtained from all volunteers.

23

24 **Conflict of interest:** None of the authors reports any conflict of interest.

25

26 **Author contribution:** STS helped with study design, performed all experiments,  
27 analysed the data and wrote the manuscript. SAT helped with study design and data  
28 analysis. PL helped with study design and data interpretation. CC came up with the  
29 original project idea, helped with study design and data interpretation. LM led the  
30 project, was responsible for the study design, helped with data analysis, data  
31 interpretation and wrote the manuscript. All authors read and approved the final version  
32 of this manuscript.

33

#### 34 **Keywords**

35 ALI cell culture, respiratory epithelial cells, high-speed videomicroscopy, ciliary beating  
36 pattern, ciliary beating frequency, primary ciliary dyskinesia, PCD

37

38 **Running head:** No effect of lidocaine on ciliary beating in vitro

39

40 **Abstract**

41 **Rationale:** Primary ciliary dyskinesia is a rare genetic disease affecting ciliary motility  
42 and causing respiratory symptoms. Diagnosis can be done by high-speed-  
43 videomicroscopy using nasal epithelial cells (NECs) obtained via brushings. This  
44 procedure can be painful, especially for children. The use of lidocaine is proposed to  
45 reduce this pain; however, it is not clear whether lidocaine changes ciliary beating  
46 frequency (CBF) or pattern (CBP) in the subsequent high-speed-videomicroscopy.

47 **Objective:** The aim of this study was to analyse the effect of lidocaine on the CBF and  
48 the CBP of differentiated, air-liquid-interface cultured NECs.

49 **Methods:** NECs from healthy volunteers were obtained via brushings and cultured at  
50 the air-liquid-interface. After differentiation, lidocaine or isotonic saline (IS, control)  
51 were added apically for 1 or 5 min each and CBF (in top view of whole inserts and side  
52 views of scratched cells) and CBP (only side view) were assessed and recorded up to  
53 150 min. CBF was computed and CBP was analysed semiquantitatively.

54 **Results:** Lidocaine as well as IS increased the CBF in the top view approach  
55 significantly compared to baseline. However, we found no significant differences  
56 between lidocaine and IS (control) treatment. Additionally, no effect of lidocaine on  
57 CBF, CBP, amplitude, inter- and intracellular coordination or transport was seen in the  
58 side view approach.

59 **Conclusion:** We conclude that the observed CBF increase is related to the addition  
60 of liquid on the mucus layer and not by the lidocaine itself. Therefore, it seems possible  
61 to use lidocaine for nasal analgesia without impact on subsequent analysis of the ciliary  
62 motility.

63

## 64 **1. Introduction**

65 Human airway epithelial cells are helpful in many diagnostic procedures as well as in  
66 research settings. They can be obtained via biopsies during bronchoscopies. However,  
67 this is quite an invasive method. Therefore, the less invasive nasal brushing has been  
68 established as a good alternative to obtain airway epithelial cells [1–3], e.g. for the  
69 diagnostics of primary ciliary dyskinesia (PCD) [4] or research about cystic fibrosis  
70 [5,6]. For PCD diagnostics, primary nasal epithelial cells (NECs) can either be  
71 analysed freshly or cultured at the air-liquid-interface (ALI), closely mimicking the  
72 conducting upper airways - with a pseudostratified epithelium containing mucus-  
73 producing and ciliated cells [7–12]. With the implementation of ALI cell cultures in the  
74 diagnostic workflow of PCD, the majority of the nasal brushings can be successfully  
75 cultivated, and thus re-brushings can be minimised to few cases with no successful  
76 cell cultivation [4,8]. For the diagnosis of PCD, the dynamics of the cilia of fresh  
77 brushings or scratched-off cell cultures are analysed with high-speed videomicroscopy  
78 (HSVM) regarding ciliary beating frequency (CBF) and pattern (CBP) [8,13]. HSVM is  
79 a recognised method for PCD diagnostics in Europe [4,8,13,14], however, it is still far  
80 from being standardised and several topics, such as ideal temperature or quantitative  
81 CBP evaluation, are still subject of current debate [15,16].

82 A nasal brushing is uncomfortable and can be painful, being of special consideration  
83 in children. One brushing, or even several re-brushings, can be perceived differently,  
84 ranging from indifference up to refusal to undergo the procedure due to painful  
85 experiences. Therefore, the use of locally applied anaesthesia has been discussed to  
86 mitigate some of the pain and could reduce the fear of the brushing. This procedure is  
87 already used in clinical practice before bronchoscopy, nasal septal surgery,  
88 manipulation of nasal fractures, endoscopic sinus surgery or nasogastric tube

89 insertion, albeit here with questionable clinical relevance, especially in the paediatric  
90 population [17–23].

91 However, concerning PCD diagnostics, it is not only important to avoid pain during the  
92 brushings, it also has to be ensured that the use of local anaesthetics does not impact  
93 the quality of the diagnostic analysis via affecting the CBF or the CBP assessed in  
94 HSVM. Older publications suggest that lidocaine in higher concentrations affects the  
95 CBF and the ciliary beat harmony [24–28] and would make the use of lidocaine in the  
96 context of PCD diagnostics impossible. However, another publication showed no  
97 difference in CBF after in vivo application [25]. Therefore, the aim of this study was to  
98 investigate whether lidocaine at a concentration used for local anaesthesia changes  
99 CBF or CBP of nasal cilia.

100

## 101 **2. Methods**

### 102 **2.1. Experimental setup**

103 NECs obtained via nasal brushing from healthy volunteers were cultured at the ALI  
104 until fully differentiated. Lidocaine or isotonic saline (IS) as a control were applied  
105 apically and washed off after either 1 or 5 min. In the following, we performed two  
106 different types of analysis: (1) **Top view analysis** in the intact cell culture on the  
107 transwell (as previously described [6], N=8). This methods allows to most closely mimic  
108 what happens in vivo after nasal application of lidocaine since the cells stay in ALI  
109 conditions. The only readout of this approach is the CBF over time. (2) **Side view**  
110 **analysis** of scratched-off cells according to classical HSVM used for PCD diagnostics  
111 (for details see [8], N=5). This approach allows – since the cells can be observed from  
112 the side – to also assess the CBP, amplitude and coordination (in addition to CBF).  
113 However, the disadvantage of this approach is that the cells are submerged in media

114 what does not represent physiological conditions. For both types of analyses the ciliary  
115 activity was followed over time.

## 116 **2.2. Sampling of epithelial cells via nasal brushing**

117 NECs were obtained from healthy adult volunteers via nasal brushings. After  
118 participants have blown their nose with a paper tissue, NECs were obtained by nasal  
119 brushings using one pre-wetted (0.9% NaCl) interdental brush (IDB-G50 3mm, Top  
120 Caredent, Zurich, Switzerland; elongated by attaching a 200µl pipette tip with parafilm)  
121 for each nostril, as previously described and evaluated [8,29]. Briefly, the brush is  
122 inserted into and removed out of the inferior turbinate of the nasal cavity a couple of  
123 times, while also slightly pressing against the lateral edges of the nasal cavity and  
124 rotating the brush. Brushes with obtained cells are immediately stored in a 15ml tube  
125 with media (RPMI, Sigma-Aldrich, cat no. R8758-500ML). The samples were cultured  
126 at the ALI, according to our previously published protocol [8] (for details see also  
127 below).

128 The study was approved by the Ethics Committees of the University Children Hospital,  
129 Inselspital Bern and of the Canton Bern, Switzerland (reference number 2018-02155).  
130 Written informed consent was obtained from all volunteers.

## 131 **2.3. Cultivation of nasal epithelial cells at the air-liquid-interface and** 132 **preparation for experiments**

133 NECs were first placed in a submerged culture using the PneumaCult-Expansion-Plus  
134 medium (Stemcell Technologies, cat#05040), then they were cultured at the ALI using  
135 the PneumaCult-ALI medium (Stemcell Technologies, cat #05001) and 12-well plates  
136 (Falcon 12-well plate, REF353043) with Transwell permeable inserts (Corning  
137 Transwell polyester membrane inserts, pore size 0.4µm, diameter 12mm, CLS3460-  
138 48EA, Sigma-Aldrich) (for details see [8]). After at least four weeks at the ALI and full

139 differentiation, the cell cultures represent a respiratory epithelium with mucus-  
140 producing, ciliated and basal cells.

141 For the top view CBF evaluation in the intact cell cultures, one day before the  
142 experiment, the NECs were washed for 15 min with 37°C phosphate-buffered saline  
143 (PBS), containing Mg<sup>2+</sup> and Ca<sup>2+</sup> (Dulbecco's PBS with MgCl<sub>2</sub> and CaCl<sub>2</sub> (PBS++),  
144 Sigma D8537-500ml), to remove excess mucus. Then, the transwells were placed in  
145 a new plate and fresh medium was added. The surrounding empty wells were filled  
146 with 1 ml PBS each, to support equilibrium in humidity and temperature during  
147 experiments.

#### 148 **2.4. Exposure to Lidocaine**

149 We exposed the NECs either for 1 or 5 min to lidocaine to mimic the application on the  
150 nasal epithelium either by using a nasal spray prior to the brushing (1 min treatment)  
151 or via the placement of a cotton pad into the nasal cavity for few minutes (5 min  
152 treatment). 200 µl Lidocaine (1% Lidocaine HCl, 10mg/ml, Bichsel, art.-no: 2057642)  
153 or 200 µl isotonic saline (80 mg NaCl in 10 ml water (Aqua ad injectabilita, Bichsel,  
154 FE1010221), ion concentrations analogous to Lidocaine solution) were warmed to  
155 37°C and added to the fully mature and differentiated cell cultures. After 1 or 5 min,  
156 the liquid was removed, the cultures were washed with PBS (also warmed to 37°C)  
157 and ciliary beating was recorded.

#### 158 **2.5. Recording and Analysis**

159 Ciliary motility was assessed at 37°C using an inverted Olympus IX73 light microscope,  
160 equipped with a heating plate or the cellVivo incubation system. Recordings were  
161 performed with a high-speed C-MOS camera (FLIR 3.2 MP Mono Grasshopper3 USB  
162 3.0 Camera, Sony IMX252 chip) for 2 s at 300 frames per second, with a resolution of

163 480 x 640 pixels and saved as 8-bit grey level tagged image file format (TIF) image  
164 series.

165 We performed two different types of analysis: (1) **Top view analysis** in the intact cell  
166 culture on the transwell (as previously described [6]): Whole transwells of cell cultures  
167 of eight healthy volunteers and a 10x objective in phase-contrast mode were used. The  
168 videos of each sample were recorded in a systematic manner at the same three spots  
169 of the insert and the whole field of view was used for CBF calculations. The  
170 temperature was kept to 37°C and the cell cultures were placed back in the incubator  
171 between recordings. (2) **Side view analysis** (only for the 5 min treatment) of  
172 scratched-off cells according to classical HSVM used for PCD diagnostics (for details  
173 see [8]): Briefly, cell agglomerates from the treated cell cultures of five healthy  
174 volunteers were scratched off from the transwells and transferred together with culture  
175 medium onto a closed chamber built by a microscopy glass slide, a 200µm thick rubber  
176 distance ring (Grace Bio-Labs CoverWell™ imaging chambers with removed cover  
177 slip; cat no. 645401) and a glass cover slip (22x22 mm, DURAN GROUP, Wertheim,  
178 Germany, cat.no. 23550327) on top. This setup allowed to record the cells from the  
179 side for the analysis of the CBP. Videos of the cells were captured with a 40x objective  
180 in bright field mode. Between recordings, the slides were left at room temperature  
181 (23°C) to mimic conditions of the PCD diagnostic procedure (at that time).

182 For both types of analyses the following timepoints were used: baseline (before the  
183 application of any liquids), 1 min (only for the 1 min treatment), 5 min, 10 min, 15 min,  
184 30 min, 60 min, 90 min, 120 min and 150 min. CBF (of top and side view recordings)  
185 was computed using a Fourier-Transformation-based algorithm of the Ciliaryzer, a  
186 Python-based program [30]. CBF values are presented as the mean of all recorded  
187 videos. All assessments of CBF were done by the same observer. . When analysing



188 CBP (of the side view recordings), each video recorded was described and analysed  
189 by a scoring system developed by S. Tschanz (for details see [8]). CBP is  
190 semiquantitatively scored with 0-4, with four referencing a physiological, complete  
191 pattern and zero referencing no pattern at all. Amplitude and coordination were also  
192 scored semiquantitatively. For those parameters the mean of all 10 videos was  
193 calculated for each timepoint of each participant and the mean of all participants for  
194 each timepoint is presented. Transport of cellular debris was scored as observed (1)  
195 or not (0). The % of transport (as presented in Table 1) is the mean of those scores  
196 and represents the ratio of videos with visible transport. Again, all assessments were  
197 done by the same observer.

198

## 199 **2.6. Statistical Analysis**

200 Data collection and statistics were done via Excel and GraphPad Prism Version 9.0.2  
201 (GraphPad Software, San Diego, California, USA). Wilcoxon matched-pairs signed  
202 rank tests were performed (with absolute values only) to compare (1) all after-treatment  
203 timepoints to the corresponding baseline and (2) the two treatments at different  
204 corresponding timepoints. A p-value <0.05 was accepted as a statistically significant  
205 difference.

206

## 207 **3. Results**

### 208 **3.1. Study Population**

209 In total, eight healthy volunteers (five female, three male) were recruited. All  
210 participants stated to be non-smokers and free of respiratory symptoms for at last four  
211 weeks before the brushing was done. The mean age was 31.4 years with a range of  
212 20 to 51 years.

### 213 **3.2. Increased CBF by lidocaine and control treatment in the top view** 214 **approach**

215 Lidocaine as well as isotonic saline (control) increased the CBF significantly to almost  
216 double CBF compared to the baseline after 30min and stayed as high until the end of  
217 the recordings after 150 min (Figure 1). However, there was no difference between  
218 lidocaine and control treatments, neither in absolute values (Figure 1A) nor when  
219 looking at values normalised to the baseline (Figure 1B). The 1 min control started out  
220 at the baseline with a CBF of 6.93 Hz (range 5.07 - 9.73 Hz), reached 10.66 Hz (6.8 -  
221 14.33 Hz) after 15 min and finally almost doubled with 11.77 Hz (8.7 - 15.8 Hz) after  
222 150 min. While the lidocaine 1 min started with 5.42 Hz (3.93 - 8.8 Hz) at the baseline,  
223 increased to 11.2 Hz (9.5 - 13.9 Hz) after 15 min and was more than double of the  
224 baseline after 150 min with 11.54 Hz (8.57 - 14.6 Hz). The control of 5 min had a  
225 baseline CBF of 7.19 Hz (4.2 - 11.37 Hz), increased to 9.76 Hz (6.55 - 14.171Hz) after  
226 15 min and reached 10.85 Hz (8.53 - 14.5 Hz) after 150 min. The 5 min lidocaine  
227 intervention started off at a baseline of 7.1 Hz (5.47 - 10.6 Hz), increased to 10.37 Hz  
228 (8.2 - 13.23 Hz) after 15 min and slightly increased further to 11.1 Hz (7.0 - 15.5 Hz)  
229 after 150 min.

230 When saline was applied for 1 min or 5min, the effect on CBF was statistically  
231 significant after 5 min or 15 min, respectively, and stayed until the end of the  
232 experiment (150 min). When lidocaine was applied for 1 min, the effect on CBF was  
233 statistically significant immediately after 1 min in comparison to baseline, when  
234 lidocaine was applied for 5 min, the effect was statistically significant in comparison to  
235 baseline after 10 min.

236 There were no statistically significant differences in CBF between the lidocaine and the  
237 control treatment with saline.

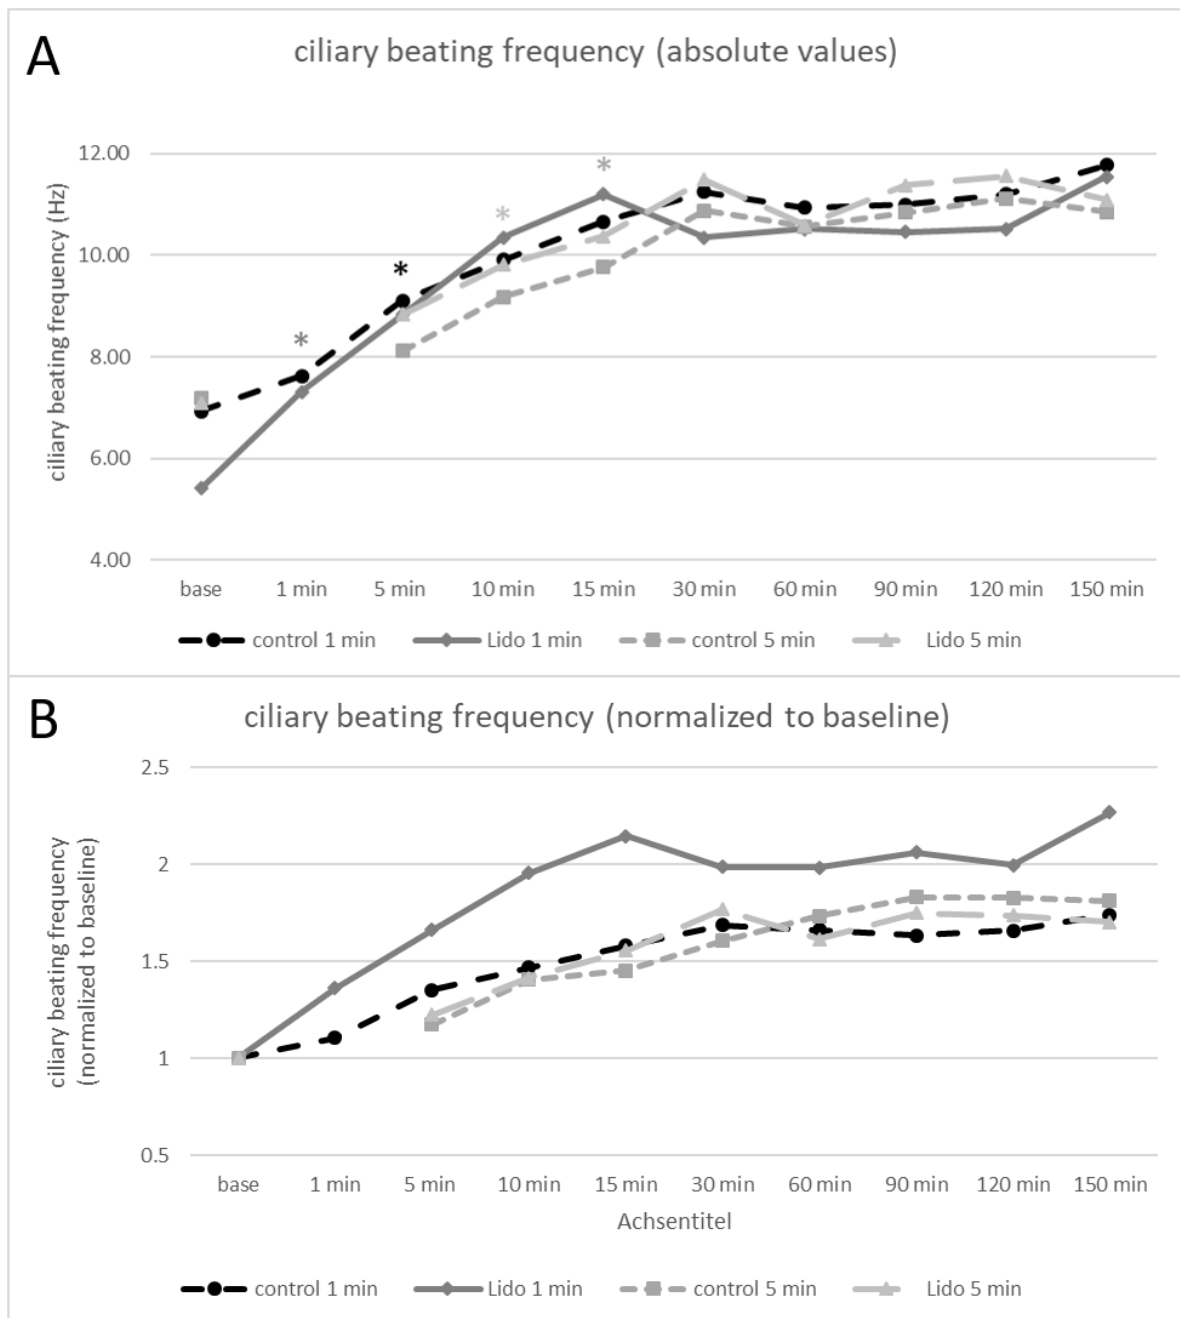

238

239 **Figure 1. (A) Ciliary beating frequency over time after treatment of ALI cell**  
 240 **cultures with lidocaine or saline (control).** \* $p < 0.05$  with Wilcoxon matched-pairs  
 241 signed rank test compared to baseline, once significant all later timepoints were also  
 242 significantly different compared to baseline. (B) Ciliary beating frequency over time  
 243 after treatment of ALI cell cultures with lidocaine or saline (control) for 1 or 5 min,  
 244 normalized to baseline. Data are shown as means (of usually 10 videos) of all 8 donors.

245

246 **3.3. Similar effect of lidocaine and saline on ciliary beating pattern or**  
247 **frequency in the side view approach**

248 There was no effect of lidocaine compared to the control treatment on the CBP,  
249 amplitude, intra- and intercellular coordination or transport in the side view approach  
250 after 5 min of liquid application (1 min application was not performed) (Table 1). CBP  
251 was 3.93 (range of 3.67 - 4.0) in the control group and 3.67 (3.0 - 4.0) in the lidocaine  
252 group 5 min after the treatment, and 3.6 (3.0 - 4.0) in the control group and 3.33 (2.67  
253 - 4.0) in the lidocaine group after 150 min. The values were similar for the amplitude  
254 observed. Intracellular coordination remained very stable (5 min: 1.93 for control and  
255 2.00 for lidocaine; 150 min: 1.93 for control, 2.0 for lidocaine), however intercellular  
256 coordination varied in both groups (5 min: 1.20 for control and 1.71 for lidocaine; 150  
257 min: 1.50 for control, 1.47 for lidocaine). Transport was visible in most of the videos (5  
258 min: 53% for control and 100% for lidocaine; 150 min: 80% for control, 87% for  
259 lidocaine). CBF in the side view approach was slightly decreasing over time, albeit not  
260 statistically significant (5.58 Hz at 5min to 5.15 Hz at 150min in the control group, 6.66  
261 Hz to 4.75 Hz for the lidocaine group).

262

263 *Table 1. Assessment of ciliary beating in classical HSVM using side views of*  
 264 *scratched-off cells (side view approach).*

| <b>control</b>             | <b>5 min</b>           | <b>10 min</b>          | <b>15 min</b>          | <b>30 min</b>          | <b>60 min</b>          | <b>90 min</b>          | <b>120 min</b>         | <b>150 min</b>         |
|----------------------------|------------------------|------------------------|------------------------|------------------------|------------------------|------------------------|------------------------|------------------------|
| CBP                        | 3.93<br>(3.7-4.0)      | 3.63<br>(3.5-4.0)      | 3.53<br>(2.0-4.0)      | 3.70<br>(3.3-4.0)      | 3.60<br>(2.7-4.0)      | 3.87<br>(3.0-4.0)      | 3.29<br>(2.7-4.0)      | 3.60<br>(3.0-4.0)      |
| amplitude                  | 3.83<br>(3.5-4.0)      | 3.77<br>(3.7-4.0)      | 3.53<br>(2.0-4.0)      | 3.9<br>(3.7-4.0)       | 3.80<br>(3.7-4.0)      | 3.73<br>(3.3-4.0)      | 3.92<br>(3.7-4.0)      | 3.73<br>(3.3-4.0)      |
| Intracellular coordination | 1.93<br>(1.7-2.0)      | 2.00<br>(2.0-2.0)      | 1.67<br>(1.0-2.0)      | 1.93<br>(1.7-2.0)      | 1.93<br>(1.7-2.0)      | 2.00<br>(2.0-2.0)      | 1.83<br>(1.0-1.7)      | 1.93<br>(1.7-2.0)      |
| Intercellular coordination | 1.20<br>(0.0-2.0)      | 1.50<br>(0.3-2.0)      | 1.27<br>(0.0-2.0)      | 1.40<br>(1.0-2.0)      | 1.60<br>(1.3-2.0)      | 1.77<br>(1.3-2.0)      | 1.50<br>(1.0-1.7)      | 1.50<br>(1.0-1.7)      |
| Transport (%)              | 53<br>(67-100)         | 63<br>(0-100)          | 67<br>(33-100)         | 87<br>(33-100)         | 67<br>(0-100)          | 67<br>(0-100)          | 75<br>(33-100)         | 80<br>(67-100)         |
| CBF                        | 5.58±0.72<br>(4.7-6.3) | 5.72±0.92<br>(4.5-6.7) | 5.75±1.0<br>(4.6-7.1)  | 5.41±0.88<br>(4.7-6.4) | 4.84±0.66<br>(4.2-5.9) | 4.96±0.8<br>(3.7-5.8)  | 4.63±0.79<br>(3.8-5.9) | 5.15±1.54<br>(3.3-7.4) |
| <b>lidocaine</b>           | <b>5 min</b>           | <b>10 min</b>          | <b>15 min</b>          | <b>30 min</b>          | <b>60 min</b>          | <b>90 min</b>          | <b>120 min</b>         | <b>150 min</b>         |
| CBP                        | 3.67<br>(3.0-4.0)      | 3.88<br>(3.5-4.0)      | 3.73<br>(3.0-4.0)      | 3.33<br>(3.0-3.7)      | 3.70<br>(3.3-4.0)      | 3.58<br>(3.0-4.0)      | 3.67<br>(3.3-4.0)      | 3.33<br>(2.7-4.0)      |
| amplitude                  | 3.92<br>(3.7-4.0)      | 3.75<br>(3.3-4.0)      | 3.80<br>(3.7-4.0)      | 3.87<br>(3.3-4.0)      | 3.57<br>(2.7-4.0)      | 3.75<br>(3.3-4.0)      | 3.83<br>(3.5-4.0)      | 3.60<br>(3.0-4.0)      |
| intracellular coordination | 2.00<br>(2.0-2.0)      | 2.00<br>(2.0-2.0)      | 1.93<br>(1.7-2.0)      | 1.80<br>(1.0-2.0)      | 2.00<br>(2.0-2.0)      | 1.92<br>(1.7-2.0)      | 1.93<br>(1.7-2.0)      | 2.00<br>(2.0-2.0)      |
| intercellular coordination | 1.71<br>(1.5-2.0)      | 1.83<br>(1.7-2.0)      | 1.53<br>(1.0-2.0)      | 1.30<br>(0.5-1.7)      | 1.63<br>(1.0-2.0)      | 1.33<br>(0.7-2.0)      | 1.40<br>(1.3-1.7)      | 1.47<br>(0.3-2.0)      |
| Transport (%)              | 75<br>(0-100)          | 58<br>(0-100)          | 87<br>(33-100)         | 77<br>(33-100)         | 80<br>(33-100)         | 63<br>(0-100)          | 80<br>(33-100)         | 87<br>(67-100)         |
| CBF                        | 6.66±0.39<br>(6.4-7.1) | 6.23±0.84<br>(5.3-6.7) | 6.33±1.38<br>(4.7-8.0) | 5.74±0.79<br>(4.7-6.6) | 4.48±0.64<br>(3.8-4.9) | 5.12±0.58<br>(4.5-5.7) | 5.23±0.61<br>(4.9-6.0) | 4.75±1.11<br>(3.7-6.3) |

265 Data are presented as mean (range) for CBP, amplitude and coordination, as mean %  
 266 (range) of videos with particle transport for transport and as mean ± standard deviation  
 267 (range) for CBF.

268

#### 269 **4. Discussion**

270 We showed that treatment of ALI NEC cultures of healthy volunteers with lidocaine did  
 271 not affect CBF differently than the control treatment. CBF increased similarly in whole  
 272 inserts of cell cultures treated with either lidocaine or control saline to roughly twice the  
 273 baseline values. The CBF, CBP, the amplitude and the coordination as well as particle  
 274 transport did not differ in side view HSVM between cells treated with lidocaine or  
 275 control saline.

276 The development of CBF values was different between the two approaches: CBF in  
277 the whole inserts with top view increased from roughly 7 to 11 Hz over the first 30min  
278 after the treatment. However, in the side view of the HSVM approach it decreased from  
279 roughly 7 to 5 Hz over 150min. There are several potential reasons for those  
280 differences. First of all, the top view recordings in the whole inserts were done at 37°C  
281 and the side view measurements at room temperature, approximately 23°C, with  
282 probably some drop of temperature since the cells and the media started at 37°C. As  
283 it is known that CBF highly depends on temperature, the temperature can explain the  
284 higher values of the top view approach and the decrease in the side view approach.  
285 Second, the side view samples are cell agglomerates in a closed imaging chamber  
286 submerged in media. Thus, those cells are surrounded with media, which represents  
287 an ending source of energy. In the side view approach, there is clearly less media per  
288 cell present compared to the whole insert top view approach. Therefore, in the side  
289 view approach exhaustion of media could be another reason for decreasing CBF over  
290 time. However, against this explanation speaks that the beating pattern was - even  
291 after 150min - still physiological. Strengths of our study include the closely mimicked  
292 in vivo conditions in vitro, such as the short application time, realistic concentrations  
293 as well as larger cell conglomerates. The ALI cultures nicely mimic the conducting  
294 airways [9–12] with the different epithelial cell types, including the ciliated cells of  
295 interest for this study. Additionally, obtaining CBF and CBP measurements from ALI  
296 cultures provides more reliable results than obtaining these values from freshly  
297 brushed cells since the quality of the sample is better and there are more cells and  
298 bigger cell groups to assess.

299 Limitations include that the lidocaine was not applied in vivo to the nose of healthy  
300 volunteers, but in vitro to cell cultures. We are aware that our study does not cover  
301 potential effects involving other respiratory cells than epithelial cells. Thus, future

302 research should study the effects in vivo in a group of patients suspicious for PCD.  
303 Rutland et al. [25] have already studied the effect of lignocaine in vivo in healthy  
304 volunteers in 1982 and did not find any effects on CBF in brushed human nasal  
305 epithelium up to 24 hours after in vivo aerosolisation. Thus, our study supports these  
306 findings. Another limitation is the type of liquid application: a volume of 200  $\mu$ l of liquid  
307 was added directly onto the cell layer and not nebulised, which would have more  
308 closely represented a nasal spray application. Even though the liquid was removed  
309 shortly afterwards (1 or 5 min later), this might have resulted in changes different than  
310 by nebulisation. Additionally, our cell cultures consist only of different types of epithelial  
311 cells (basal, mucus producing and ciliated cells) without other cell types that are usually  
312 present in the nose, such as immune cells.

313 In contrast to some of the rare published literature, we could not see the ciliodepressive  
314 or even ciliostatic effects that were described previously [24–28,31–33]. However, our  
315 study setting was also slightly different to the other studies. Mostow et al. incubated  
316 ferret trachea for 60 min with 1% and 2% lidocaine and observed complete ciliostasis,  
317 which was partially reversible at 1% after washing and removal of the trachea from the  
318 lidocaine incubation chamber. At lower concentrations (0.25 and 0.5%) they observed  
319 no effects [24]. Verra et al. applied lidocaine onto tracheal rings of guinea pigs and  
320 cattles where incubation with 1% lidocaine showed a marked decrease in CBF.  
321 However, the effect was shown to be completely reversible after rinsing [26]. Ingels et  
322 al. showed a decrease in CBF at 0.25% lidocaine application and irreversible ciliostasis  
323 at 2% in human nasal mucosa biopsy specimen. However, they used a superfusion  
324 chamber keeping the biopsies in submerged conditions and not at the ALI. In  
325 comparison to our setting this may mask any hydration effect of the mucus layer we  
326 have observed. The duration of the treatment was 6 min, thus quite similar to our study  
327 (1 or 5 min). Additionally, this publication did not report on the temperature, which can

328 have a significant effect on ciliary motility [27]. Rutland, Griffin and Cole also showed  
329 a decreasing effect on CBF after adding lidocaine (lignocaine) at concentrations  
330 >0.25% to brushed human NECs ex vivo, progressing to ciliostasis when  
331 concentrations over 2% were applied. The samples were stored in media containing  
332 lignocaine for 30 min, not reflecting ALI conditions of the mucosa. They found a cilio-  
333 inhibition ex vivo, but only at concentrations far above from clinical practice and what  
334 we used in our study, however, as mentioned above, they did not find any effects on  
335 CBF up to 24 hours in brushed human nasal epithelium after in vivo aerosolisation [25].  
336 We found a similar effect of lidocaine and control saline on the CBF and therefore  
337 conclude that the increased CBF most probably relates to the addition of fluid onto the  
338 periciliary layer and a hydration of the mucus layer [35]. The strong effect of mucus  
339 hydration due to adding liquid could maybe mask an inhibitory effect induced by  
340 lidocaine. However, in our study we wanted to test whether the application of lidocaine  
341 in the context of a nasal brushing for PCD diagnostics would affect the downstream  
342 analysis of CBF and CBP, and thus we can conclude here that our findings do not  
343 speak against the application of lidocaine to reduce pain of nasal brushings performed  
344 for the analysis of the ciliary motility.

345 We conclude that application of lidocaine in vitro does not affect the assessment of the  
346 ciliary motility via HSVM and that this may also be true for in vivo use in the context of  
347 nasal brushings as done for PCD diagnostics. This would be especially relevant for  
348 children that according to the ERS algorithm would have to be brushed three times if  
349 cell culture is not available at the diagnostic centre they're referred to.

350

351

352



353 **5. Acknowledgments**

354 We thank all volunteers for donating nasal cells and Andrea Stokes (Division of  
355 Paediatric Respiratory Medicine and Allergology, Department of Paediatrics,  
356 Inselspital; Lung Precision Medicine (LPM), Department of BioMedical Research  
357 (DBMR), University of Bern, Switzerland) for her excellent lab work.

358

359 **6. Funding**

360 STS's work was supported by the German Academic Scholarship Foundation  
361 (Studienstiftung des Deutschen Volkes).

362

363 **7. References**

364 1. Rutland J, Griffin W, Cole P. Nasal brushing and measurement of ciliary beat frequency.  
365 An in vitro method for evaluating pharmacologic effects on human cilia. *Chest*. 1981 Dec;80(6  
366 Suppl):865–7.

367 2. Rusznak C, Devalia JL, Lozewicz S, et al. The assessment of nasal mucociliary  
368 clearance and the effect of drugs. *Respir Med*. 1994 Feb;88(2):89–101.

369 3. Merkus FW, Verhoef JC, Schipper NG, et al. Nasal mucociliary clearance as a factor in  
370 nasal drug delivery. *Adv Drug Deliv Rev*. 1998 Jan 5;29(1–2):13–38.

371 4. Lucas JS, Barbato A, Collins SA, et al. European Respiratory Society guidelines for the  
372 diagnosis of primary ciliary dyskinesia. *Eur Respir J*. 2017 Jan;49(1):1601090.

373 5. Schögler A, Blank F, Brügger M, et al. Characterization of pediatric cystic fibrosis  
374 airway epithelial cell cultures at the air-liquid interface obtained by non-invasive nasal cytology  
375 brush sampling. *Respir Res*. 2017 Dec 28;18(1):215.

- 376 6. Escher A, Kieninger E, De Groof S, et al. In Vitro Effect of Combined Hypertonic Saline  
377 and Salbutamol on Ciliary Beating Frequency and Mucociliary Transport in Human Nasal  
378 Epithelial Cells of Healthy Volunteers and Patients with Cystic Fibrosis. *J Aerosol Med Pulm*  
379 *Drug Deliv.* 2023 May 17;
- 380 7. Müller L, Brighton LE, Carson JL, et al. Culturing of Human Nasal Epithelial Cells at  
381 the Air Liquid Interface. *J Vis Exp JoVE.* 2013 Oct 8;(80).
- 382 8. Müller L, Savas ST, Tschanz SA, et al. A Comprehensive Approach for the Diagnosis  
383 of Primary Ciliary Dyskinesia-Experiences from the First 100 Patients of the PCD-UNIBE  
384 Diagnostic Center. *Diagn Basel Switz.* 2021 Aug 25;11(9):1540.
- 385 9. Comer DM, Elborn JS, Ennis M. Comparison of nasal and bronchial epithelial cells  
386 obtained from patients with COPD. *PloS One.* 2012;7(3):e32924.
- 387 10. Devalia JL, Sapsford RJ, Wells CW, et al. Culture and comparison of human bronchial  
388 and nasal epithelial cells in vitro. *Respir Med.* 1990 Jul;84(4):303–12.
- 389 11. McDougall CM, Blaylock MG, Douglas JG, et al. Nasal Epithelial Cells as Surrogates  
390 for Bronchial Epithelial Cells in Airway Inflammation Studies. *Am J Respir Cell Mol Biol.*  
391 2008 Nov;39(5):560–8.
- 392 12. Roberts N, Al Mubarak R, Francisco D, et al. Comparison of paired human nasal and  
393 bronchial airway epithelial cell responses to rhinovirus infection and IL-13 treatment. *Clin*  
394 *Transl Med.* 2018 May 2;7(1):13.
- 395 13. Rubbo B, Shoemark A, Jackson CL, et al. Accuracy of High-Speed Video Analysis  
396 to Diagnose Primary Ciliary Dyskinesia. *Chest.* 2019 May 1;155(5):1008–17.
- 397 14. Nussbaumer M, Kieninger E, Tschanz SA, et al. Diagnosis of primary ciliary  
398 dyskinesia: discrepancy according to different algorithms. *ERJ Open Res.* 2021  
399 Oct;7(4):00353–2021.

- 400 15. Bricmont N, Alexandru M, Louis B, et al. Ciliary Videomicroscopy: A Long Beat from  
401 the European Respiratory Society Guidelines to the Recognition as a Confirmatory Test for  
402 Primary Ciliary Dyskinesia. *Diagn Basel Switz*. 2021 Sep 17;11(9):1700.
- 403 16. Kempeneers C, Seaton C, Garcia Espinosa B, et al. Ciliary functional analysis: Beating  
404 a path towards standardization. *Pediatr Pulmonol*. 2019 Oct;54(10):1627–38.
- 405 17. Juhl GA, Connors GP. Emergency physicians' practices and attitudes regarding  
406 procedural anaesthesia for nasogastric tube insertion. *Emerg Med J EMJ*. 2005 Apr;22(4):243–  
407 5.
- 408 18. Chadha NK, Repanos C, Carswell AJ. Local anaesthesia for manipulation of nasal  
409 fractures: systematic review. *J Laryngol Otol*. 2009 Aug;123(8):830–6.
- 410 19. Cullen L, Taylor D, Taylor S, et al. Nebulized lidocaine decreases the discomfort of  
411 nasogastric tube insertion: a randomized, double-blind trial. *Ann Emerg Med*. 2004  
412 Aug;44(2):131–7.
- 413 20. Webb AR, Woodhead MA, Dalton HR, et al. Topical nasal anaesthesia for fiberoptic  
414 bronchoscopy: patients' preference for lignocaine gel. *Thorax*. 1989 Aug;44(8):674–5.
- 415 21. Webb AR, Fernando SS, Dalton HR, et al. Local anaesthesia for fiberoptic  
416 bronchoscopy: transcrioid injection or the 'spray as you go' technique? *Thorax*. 1990  
417 Jun;45(6):474–7.
- 418 22. Craig SS, Seith RW, Cheek JA, et al. Lidocaine and phenylephrine versus saline placebo  
419 nasal spray for the pain and distress of nasogastric tube insertion in young children and infants:  
420 a randomised, double-blind, controlled trial. *Lancet Child Adolesc Health*. 2019 Jun;3(6):391–  
421 7.
- 422 23. Fujiwara T, Kuriyama A, Kato Y, et al. Perioperative local anaesthesia for reducing pain  
423 following septal surgery. *Cochrane Database Syst Rev*. 2018 Aug 23;8(8):CD012047.

- 424 24. Mostow SR, Dreisin RB, Manawadu BR, et al. Adverse effects of lidocaine and  
425 methylparaben on tracheal ciliary activity. *The Laryngoscope*. 1979 Oct;89(10 Pt 1):1697–701.
- 426 25. Rutland J, Griffin W, Cole PJ. An in vitro model for studying the effects of  
427 pharmacological agents on human ciliary beat frequency: effects of lignocaine. *Br J Clin*  
428 *Pharmacol*. 1982 May;13(5):679–83.
- 429 26. Verra F, Escudier E, Pinchon MC, et al. Effects of local anaesthetics (lidocaine) on the  
430 structure and function of ciliated respiratory epithelial cells. *Biol Cell*. 1990;69(2):99–105.
- 431 27. Ingels KJ, Nijziel MR, Graamans K, et al. Influence of cocaine and lidocaine on human  
432 nasal cilia. Beat frequency and harmony in vitro. *Arch Otolaryngol Head Neck Surg*. 1994  
433 Feb;120(2):197–201.
- 434 28. Workman AD, Cohen NA. The effect of drugs and other compounds on the ciliary beat  
435 frequency of human respiratory epithelium. *Am J Rhinol Allergy*. 2014 Dec;28(6):454–64.
- 436 29. Stokes AB, Kieninger E, Schögler A, et al. Comparison of three different brushing  
437 techniques to isolate and culture primary nasal epithelial cells from human subjects. *Exp Lung*  
438 *Res*. 2014 Sep;40(7):327–32.
- 439 30. Schneiter M, Tschanz SA, Müller L, et al. The Ciliaryzer – A freely available open-  
440 source software for the analysis of mucociliary activity in respiratory cells.; *Comput Methods*  
441 *Programs Biomed*. 2023 241: 107744
- 442 31. Corssen G. Toxic effects of local anaesthetics on human respiratory epithelium. *Can*  
443 *Anaesth Soc J*. 1973 Jan;20(1):17–20.
- 444 32. Roth Y, Aharonson EF, Teichtahl H, et al. Human in vitro nasal and tracheal ciliary beat  
445 frequencies: comparison of sampling sites, combined effect of medication, and demographic  
446 relationships. *Ann Otol Rhinol Laryngol*. 1991 May;100(5 Pt 1):378–84.
- 447 33. Manawadu BR, Mostow SR, LaForce FM. Local anesthetics and tracheal ring ciliary

448 activity. *Anesth Analg*. 1978 Aug;57(4):448–52.

449 34. Miyamoto Y, Muto E, Mashimo T, et al. Direct inhibition of microtubule-based kinesin  
450 motility by local anesthetics. *Biophys J*. 2000 Feb;78(2):940–9.

451 35. Boucher RC. Mucous-Obstructive Lung Diseases. Drazen JM, editor. *N Engl J Med*. 2019  
452 May 16;380(20):1941–53.

453
